# Supplementary material for: Lactobacilli spp.: real-time evaluation of biofilm growth
Source: BMC Microbiol. 2020 Mar 24;20:64. doi: 10.1186/s12866-020-01753-3 (PMC7092459; doi:10.1186/s12866-020-01753-3)
Supplement: Supplementary file 2 — Additional file 2 Table 2S. Comparison of whole genome expression between attached and detached phases of biofilm growth of L. plantarum at 24 h. [file 12866_2020_1753_MOESM2_ESM.xlsx]

## Sheet: Sheet1
Synonym	locus_tag ATCC 14917	Name	Product	Expression Spatula_24h	Expression Microfermenter_24h	pValue Microfermenter_24h vs Spatula_24h	qValue Microfermenter_24h vs Spatula_24h	FC (S24h|M24h)	Pathway
lp_2461	HMPREF0531_RS14980	-	prophage P2b protein 20	28	995	1.22426e-248	7.63446e-246	-35.5357
lp_2994	HMPREF0531_RS09915	-	hypothetical protein	656	6471	4.82239e-28	1.07402e-25	-9.86433
lp_0129	HMPREF0531_RS07475	hsp1	small heat shock protein	2398	22108	4.41031e-06	0.000275027	-9.21935	Transcriptional Regulation
lp_3663	HMPREF0531_RS06860	-	nucleotide-binding protein, universal stress protein UspA family	255	1982	4.01471e-19	7.36345e-17	-7.77255
lp_0322	HMPREF0531_RS08270	-	GNAT family acetyltransferase	465	2971	1.15064e-07	9.96583e-06	-6.38925
lp_3164	HMPREF0531_RS10590	-	TetR family transcriptional regulator	463	2952	3.95175e-07	3.08039e-05	-6.37581
lp_0240	HMPREF0531_RS07935	-	hypothetical protein	246	1481	9.37084e-11	1.08216e-08	-6.02033
lp_2704	HMPREF0531_RS11570	pyrR1	pyrimidine operon regulator	466	2604	9.08844e-06	0.000524773	-5.58798
lp_0321	HMPREF0531_RS08265	-	GNAT family acetyltransferase	619	3408	3.7249e-05	0.00178681	-5.50565
lp_3495	HMPREF0531_RS13320	-	LysR family transcriptional regulator	143	765	2.28339e-08	2.28384e-06	-5.34965
lp_2666	HMPREF0531_RS11715	-	hypothetical protein	278	1453	6.7493e-08	6.37706e-06	-5.22662
lp_2615	HMPREF0531_RS11890	-	GntR family transcriptional regulator	158	825	2.27565e-05	0.00114443	-5.22152
lp_3312	HMPREF0531_RS12655	-	beta-lactamase family protein	149	776	7.67255e-08	7.03618e-06	-5.20805
lp_2526	HMPREF0531_RS12185	-	GNAT family acetyltransferase	41	210	0.000869522	0.0234269	-5.12195
lp_0965	HMPREF0531_RS04840	-	ArsR family transcriptional regulator	152	774	0.000111896	0.0046519	-5.09211
lp_3191	HMPREF0531_RS10700	rrp11	two component system response regulator	666	3368	0.00196128	0.0449652	-5.05706
lp_0762	HMPREF0531_RS03995	-	membrane protein	166	822	3.01573e-07	2.41103e-05	-4.95181
lp_2987	HMPREF0531_RS09885	-	hypothetical protein	606	2950	5.16164e-07	3.92537e-05	-4.86799
lp_2664	HMPREF0531_RS11725	-	metal-dependent phosphohydrolase, HD family	242	1170	1.08822e-06	7.89086e-05	-4.83471
lp_2126	HMPREF0531_RS02780	rpsT	30S ribosomal protein S20	140	664	0.00134146	0.032677	-4.74286
lp_2370	HMPREF0531_RS06050	atpB	H(+)-transporting two-sector ATPase, A subunit	213	1009	1.83386e-06	0.000124304	-4.73709	Purine Nucleotide Biosynthesis
lp_1135	HMPREF0531_RS05525	-	1,4-dihydroxy-2-naphthoate octaprenyltransferase	99	461	3.4627e-06	0.000220341	-4.65657
lp_2668	HMPREF0531_RS11705	hsp2	small heat shock protein	172	771	0.000122414	0.00502219	-4.48256
lp_3580	HMPREF0531_RS13645	lamA	two-component system response regulator; accesory gene regulator protein A	304	1319	0.000442697	0.0138033	-4.33882	Transcriptional Regulation
lp_3273	HMPREF0531_RS11035	cls	cardiolipin synthetase 2	117	499	4.65705e-05	0.0022001	-4.26496
lp_0844	HMPREF0531_RS04360	licD	lipooligosaccharide cholinephosphotransferase	280	1178	0.000761583	0.0210143	-4.20714
lp_3506	HMPREF0531_RS13370	-	GntR family transcriptional regulator	102	428	0.000290425	0.0102903	-4.19608
lp_0226	HMPREF0531_RS07870	nagB	glucosamine-6-phosphate isomerase/deaminase	313	1213	0.00199747	0.0454607	-3.8754
lp_3597	HMPREF0531_RS13730	rhaR	AraC family transcriptional regulator	169	651	0.000251107	0.00910409	-3.85207
lp_3366	HMPREF0531_RS12850	-	hypothetical protein	441	1648	0.000210047	0.00779676	-3.73696
lp_2830	HMPREF0531_RS09245	ansB	aspartate ammonia-lyase	85	305	0.000448675	0.0138182	-3.58824	L-Aspartate Biosynthesis
lp_1267	HMPREF0531_RS14895	-	MarR family transcriptional regulator	492	1761	0.00191154	0.0441495	-3.57927
lp_2056	HMPREF0531_RS02465	-	HAD-superfamily hydrolase	147	523	0.000514984	0.0150067	-3.55782
lp_3119	HMPREF0531_RS10425	-	TetR family transcriptional regulator	152	534	0.000625143	0.0177199	-3.51316
lp_0146	HMPREF0531_RS07530	-	NADH:flavin oxidoreductase	90	313	0.000704975	0.019626	-3.47778
lp_1353	HMPREF0531_RS14115	-	hydrolase, HAD superfamily, Cof family	157	527	0.00130022	0.0321752	-3.35669
lp_2753	HMPREF0531_RS11370	-	phosphohydrolase	225	745	0.00125001	0.0314318	-3.31111
lp_1974	HMPREF0531_RS02195	-	transcription regulator of gluconeogenic genes	92	46	0.00183804	0.0427687	2
lp_1618	HMPREF0531_RS00695	pppL	serine/threonine specific protein phosphatase	86	42	0.00126457	0.0315434	2.04762
lp_0176	HMPREF0531_RS07655	mdxF	maltodextrin ABC transporter, permease protein	73	35	0.00155103	0.0372009	2.08571	Maltooligosaccharide transport system
lp_2542	HMPREF0531_RS12140	-	ABC transporter permease	59	28	0.00165668	0.0394315	2.10714
lp_0586	HMPREF0531_RS03465	pts10A	PTS system, mannose-specific EIIAcomponent	106	49	0.0016575	0.0394315	2.16327
lp_1672	HMPREF0531_RS00915	acpA2	acyl carrier protein	210	96	0.00109839	0.028072	2.1875	Fatty acid and phospholipid metabolism
lp_1038	HMPREF0531_RS05120	rpsS	30S ribosomal protein S19	116	53	0.00218589	0.0493885	2.18868
lp_2736	HMPREF0531_RS11450	cah	carbonate dehydratase	290	131	0.00105378	0.0271545	2.21374
lp_1044	HMPREF0531_RS05145	rpsQ	30S ribosomal protein S17	274	123	0.00034672	0.0114088	2.22764
lp_2622	HMPREF0531_RS11870	-	Cro/CI family transcriptional regulator	240	107	0.000570687	0.0164759	2.24299
lp_1752	HMPREF0531_RS01260	recU	recombinase	194	86	0.000502596	0.0147839	2.25581
lp_1045	HMPREF0531_RS05150	rplN	50S ribosomal protein L14	405	179	0.000811713	0.0222011	2.26257
lp_3267	HMPREF0531_RS11005	gshR4	glutathione reductase	145	64	0.000951465	0.0251412	2.26562
lp_2192	HMPREF0531_RS03035	sepF	cell division protein	84	37	0.00141069	0.0340971	2.27027
lp_0691	HMPREF0531_RS03640	-	hypothetical protein	82	36	0.000891977	0.0237708	2.27778
lp_0960a	HMPREF0531_RS04820	-	hypothetical protein	57	25	0.000864045	0.0234269	2.28
lp_0795	HMPREF0531_RS04140	secG	preprotein translocase subunit SecG	365	160	0.000325418	0.0112583	2.28125
lp_1264	HMPREF0531_RS14885	oppD	oligopeptide ABC transporter ATP-binding protein	89	39	0.000490208	0.0145568	2.28205	Oligopeptide transport system
lp_1436	HMPREF0531_RS00050	ribB	riboflavin synthase, alpha chain	298	130	0.0003958	0.0127227	2.29231
lp_1469	HMPREF0531_RS00185	sufD	ABC transporter, iron-sulfur cluster assembly protein SufD	69	30	0.000326659	0.0112583	2.3
lp_1509	HMPREF0531_RS00225	fpg	formamidopyrimidine-DNA glycosylase	161	70	0.000447607	0.0138182	2.3
lp_2042	HMPREF0531_RS02405	-	nucleic-acid-binding protein implicated in transcription termination	652	283	0.000665036	0.0186809	2.30389
lp_1549	HMPREF0531_RS00390	sbcD	exonuclease SbcD	79	34	0.000398022	0.0127227	2.32353
lp_1839	HMPREF0531_RS01610	parC	topoisomerase IV, subunit A	93	40	0.000969501	0.0251909	2.325
lp_0755	HMPREF0531_RS03935	lgt	prolipoprotein diacylglyceryl transferase	221	94	0.000423372	0.0133341	2.35106
lp_1468	HMPREF0531_RS00180	sufC	ABC transporter, ATP-binding protein,iron-sulfur cluster assembly ATPase protein SufC	73	31	0.00046355	0.0140325	2.35484
lp_3060	HMPREF0531_RS10175	-	AraC family transcriptional regulator	71	30	0.000368098	0.0119555	2.36667
lp_0177	HMPREF0531_RS07660	mdxG	maltodextrin ABC transporter, permease protein	74	31	0.000184794	0.00711342	2.3871	Maltooligosaccharide transport system
lp_0882	HMPREF0531_RS04490	glnM	glutamine ABC transporter, permease protein	114	47	8.5823e-05	0.0036657	2.42553	Glutamine transport system
lp_1990	HMPREF0531_RS02270	-	50S ribosomal protein L11 methyltransferase	103	42	0.000127364	0.00515741	2.45238
lp_3199	HMPREF0531_RS10740	parA	chromosome partitioning ATPase	108	44	8.42265e-05	0.00364748	2.45455
lp_2267	HMPREF0531_RS06495	xtp1	xanthosine triphosphate pyrophosphatase	64	26	0.0004848	0.0145347	2.46154
lp_1263	HMPREF0531_RS14880	oppC	oligopeptide ABC transporter permease	217	87	0.000253983	0.00910409	2.49425	Oligopeptide transport system
lp_2043	HMPREF0531_RS02410	nusA	transcription termination-antitermination factor NusA	168	67	0.000142606	0.00570058	2.50746
lp_1788	HMPREF0531_RS01415	-	hypothetical protein	128	51	0.00020375	0.00765414	2.5098
lp_2191	HMPREF0531_RS03030	-	cell division protein	93	37	0.000227695	0.00835241	2.51351
lp_1638	HMPREF0531_RS00785	rimM	16S rRNA processing protein	68	27	0.00032772	0.0112583	2.51852
lp_1041	HMPREF0531_RS05135	rplP	50S ribosomal protein L16	281	111	7.02757e-05	0.00313028	2.53153
lp_1035	HMPREF0531_RS05110	rplW	50S ribosomal protein L23	1099	429	0.000291579	0.0102903	2.56177
lp_0881	HMPREF0531_RS04485	glnH1	glutamine ABC transporter, substrate binding protein	100	39	2.5854e-05	0.00127957	2.5641	Glutamine transport system
lp_1673	HMPREF0531_RS00920	fabD	[acyl-carrier protein] S-malonyltransferase	271	103	0.00010722	0.00451772	2.63107
lp_1887	HMPREF0531_RS01800	-	riboflavin transporter	158	60	1.83038e-05	0.00100125	2.63333
lp_2201	HMPREF0531_RS03075	ftsL	cell division protein FtsL	248	94	1.97223e-05	0.00104227	2.6383
lp_1046	HMPREF0531_RS05155	rplX	50S ribosomal protein L24	187	70	5.31787e-05	0.0024384	2.67143
lp_2019	HMPREF0531_RS02310	dltA	D-alanine--poly(phosphoribitol) ligase subunit 1	172	64	8.06171e-05	0.00354034	2.6875
lp_1039	HMPREF0531_RS05125	rplV	50S ribosomal protein L22	156	58	5.97409e-05	0.0026996	2.68966
lp_1729	HMPREF0531_RS01155	malT	carbohydrate/proton transporter	122	44	2.22914e-05	0.00113942	2.77273
lp_2742	HMPREF0531_RS11420	-	GntR family transcriptional regulator	75	27	5.01524e-05	0.00233396	2.77778
lp_1056	HMPREF0531_RS05195	secY	preprotein translocase subunit SecY	103	37	1.3198e-05	0.000748205	2.78378
lp_1048	HMPREF0531_RS15300	rpsN	30S ribosomal protein S14	344	123	1.6169e-05	0.000900266	2.79675
lp_1631	HMPREF0531_RS00750	rnc	ribonuclease III	62	22	3.60052e-05	0.00175413	2.81818
lp_0769	HMPREF0531_RS04020	aad	D-alanyl-D-alanine dipeptidase	177	62	2.28068e-06	0.000151301	2.85484
lp_0747	HMPREF0531_RS03895	pstD	phosphate ABC transporter permease	66	23	1.91838e-05	0.0010313	2.86957
lp_2680	HMPREF0531_RS11665	-	membrane protein	248	85	1.54084e-06	0.000106763	2.91765
lp_1047	HMPREF0531_RS05160	rplE	50S ribosomal protein L5	240	82	3.13249e-06	0.000203481	2.92683
lp_3271	HMPREF0531_RS11025	guaC	GMP reductase	209	70	5.09024e-06	0.000311203	2.98571
lp_2932	HMPREF0531_RS09680	nrdD	anaerobic ribonucleoside-triphosphate reductase	257	86	0.000324966	0.0112583	2.98837
lp_1900	HMPREF0531_RS01855	-	membrane protein	888	290	1.00795e-06	7.48284e-05	3.06207
lp_1040	HMPREF0531_RS05130	rpsC	30S ribosomal protein S3	176	57	2.60231e-07	2.13527e-05	3.08772
lp_1730	HMPREF0531_RS01160	mapA	maltose phosphorylase	351	110	0.00118249	0.0299757	3.19091
lp_3270	HMPREF0531_RS11020	purA	adenylosuccinate synthase	296	91	1.27881e-06	9.06209e-05	3.25275
lp_1036	HMPREF0531_RS05115	rplB	50S ribosomal protein L2	479	139	1.84421e-07	1.55412e-05	3.44604
lp_2369	HMPREF0531_RS06055	atpE	H(+)-transporting two-sector ATPase, C subunit	307	89	7.94875e-08	7.0812e-06	3.44944	Purine Nucleotide Biosynthesis
lp_2365	HMPREF0531_RS06075	atpG	H(+)-transporting two-sector ATPase, gamma subunit	683	193	5.91421e-06	0.000349255	3.53886	Purine Nucleotide Biosynthesis
lp_1026	HMPREF0531_RS05085	rpsG	30S ribosomal protein S7	815	227	2.27065e-08	2.28384e-06	3.59031
lp_2017	HMPREF0531_RS02300	dltC1	D-alanine--poly(phosphoribitol) ligase subunit 2	203	55	6.14093e-09	6.38247e-07	3.69091
lp_1050	HMPREF0531_RS05165	rpsH	30S ribosomal protein S8	376	98	4.56655e-11	5.47635e-09	3.83673
lp_1262	HMPREF0531_RS14875	oppB	oligopeptide ABC transporter permease	103	26	3.45691e-11	4.31146e-09	3.96154	Oligopeptide transport system
lp_1032	HMPREF0531_RS05095	rpsJ	30S ribosomal protein S10	794	196	1.49229e-11	1.93873e-09	4.05102
lp_2368	HMPREF0531_RS06060	atpF	H(+)-transporting two-sector ATPase, B subunit	616	147	4.54609e-12	6.16292e-10	4.19048	Purine Nucleotide Biosynthesis
lp_1290	HMPREF0531_RS14320	-	purine/pyrimidine permease	96	22	5.45635e-13	7.73313e-11	4.36364
lp_1289	HMPREF0531_RS14325	-	purine/pyrimidine phosphoribosyltransferase	129	25	3.9128e-18	6.77784e-16	5.16
lp_2720	HMPREF0531_RS11520	purH	bifunctional protein: phosphoribosylaminoimidazolecarboxamide formyltransferase; IMP cyclohydrolase	661	122	1.31467e-13	2.04957e-11	5.41803	Purine Nucleotide Biosynthesis
lp_2724	HMPREF0531_RS11500	purL	phosphoribosylformylglycinamidine synthase II	1124	203	2.05978e-05	0.0010704	5.53695	Purine Nucleotide Biosynthesis
lp_2721	HMPREF0531_RS11515	purN	phosphoribosylglycinamide formyltransferase	593	107	1.37847e-22	2.86537e-20	5.54206	Purine Nucleotide Biosynthesis
lp_2719	HMPREF0531_RS11525	purD	phosphoribosylamine--glycine ligase	514	78	6.01024e-31	1.44153e-28	6.58974	Purine Nucleotide Biosynthesis
lp_0548	HMPREF0531_RS09140	hsp33	heat shock protein HSP33	225	32	2.60739e-42	6.77486e-40	7.03125
lp_2725	HMPREF0531_RS11495	purQ	phosphoribosylformylglycinamidine synthase I	400	50	5.75744e-60	1.79517e-57	8	Purine Nucleotide Biosynthesis
lp_2727	HMPREF0531_RS11485	purC	phosphoribosylaminoimidazolesuccinocarboxamide synthase	412	48	2.04791e-68	7.09487e-66	8.58333	Purine Nucleotide Biosynthesis
lp_2728	HMPREF0531_RS11480	purK1	phosphoribosylaminoimidazole carboxylase,ATPase subunit	1212	128	2.99727e-59	8.4959e-57	9.46875	Purine Nucleotide Biosynthesis
lp_2726	HMPREF0531_RS11490	purS	phosphoribosylformylglycinamidine synthase,PurS component	625	65	4.44699e-73	1.73321e-70	9.61538	Purine Nucleotide Biosynthesis
lp_2729	HMPREF0531_RS11475	purE	phosphoribosylaminoimidazole carboxylase,catalytic subunit	909	67	2.36628e-205	1.22967e-202	13.5672	Purine Nucleotide Biosynthesis
lp_2722	HMPREF0531_RS11510	purM	phosphoribosylformylglycinamidine cyclo-ligase	3579	225	3.07681e-120	1.3705e-117	15.9067	Purine Nucleotide Biosynthesis
lp_2723	HMPREF0531_RS11505	purF	amidophosphoribosyltransferase	1139	50	0	0	22.78	Purine Nucleotide Biosynthesis
